## Correction: Intake of red and processed meat and risk of renal cell carcinoma: a meta-analysis of observational studies

Shaojin Zhang<sup>1</sup>, Qingwei Wang<sup>1</sup> and Juanjuan He<sup>2</sup>

<sup>1</sup> Department of Urology Surgery, The First Affiliated Hospital, Zhengzhou University, Zhengzhou, Henan Province, China

<sup>2</sup> Department of Breast Surgery, The First Affiliated Hospital, Zhengzhou University, Zhengzhou, Henan Province, China

**Published:** June 22, 2018

**Copyright:** Zhang et al. This is an open-access article distributed under the terms of the Creative Commons Attribution License 3.0 (CC BY 3.0), which permits unrestricted use, distribution, and reproduction in any medium, provided the original author and source are credited.

**This article has been corrected:** The correct spelling of author name is given below:

**Shaojin Zhang**

Original article: Oncotarget. 2017; 8:77942-77956. <https://doi.org/10.18632/oncotarget.18549>
